# Supplementary material for: Encapsulating low-coordinated Pt clusters within a metal–organic framework induces spatial charge separation boosting photocatalytic hydrogen evolution
Source: Royal Society of Chemistry journal article supplement (doi:10.1039/d0cy00809e), 2020-01-01
Supplement: d0cy00809e1.pdf [file d0cy00809e1.pdf]

Supporting Information  
for

**Encapsulating Low-Coordinated Pt Clusters within a Metal-Organic Framework Induces Spatial Charge Separation Boosting Photocatalytic Hydrogen Evolution**

Yao-Yao Wang,<sup>a</sup> Zheng Tang,<sup>a</sup> Xue-Yang Ji,<sup>a</sup> Song Wang,<sup>\*b</sup> Zi-Shuo Yao<sup>\*a</sup> and Jun Tao<sup>\*a</sup>

<sup>a</sup> Key Laboratory of Cluster Science of Ministry of Education, School of Chemistry and Chemical Engineering, Liangxiang Campus, Beijing Institute of Technology, Beijing 102488, P. R. China

<sup>b</sup> Hubei Key Laboratory of Low Dimensional Optoelectronic Materials and Devices, Hubei University of Arts and Science, Xiangyang, Hubei 441053, P. R. China

E-mail: taojun@bit.edu.cn; zishuoyao@bit.edu.cn; wangsong1984@126.com.

**Table of Contents**

|                                                             |    |
|-------------------------------------------------------------|----|
| 1. Table S1. ICP-MS analysis of catalysts                   | S3 |
| 2. Table S2. Summary of some MOF-based photocatalysts       | S3 |
| 3. Figure S1 The PXRD patterns of PCs-U6N, Pt-U6N and CPU6N | S4 |
| 4. Figure S2. SEM and TEM images of PCs@U6N and CPU6N       | S4 |
| 5. Figure S3. TEM images of PCs-U6N                         | S4 |
| 6. Figure S4. Pt nanoparticle size distribution in PCs-U6N  | S5 |
| 8. Figure S5. TEM images of Pt-U6N                          | S5 |
| 9. Figure S6. Pt nanoparticle size distribution in Pt-U6N   | S5 |
| 10. Figure S7. SEM and TEM images of U6N                    | S6 |
| 11. Figure S8. SEM and TEM images of Pt@U6N                 | S6 |
| 12. Figure S9. Pt nanoparticle size distribution in Pt@U6N  | S6 |
| 13. Figure S10. SEM and TEM images of Pt/U6N                | S7 |
| 14. Figure S11. Pt nanoparticle size distribution in Pt/U6N | S7 |

|                                                                                                                                                                        |     |
|------------------------------------------------------------------------------------------------------------------------------------------------------------------------|-----|
| 15. Figure S12. HAADF-STEM and EDX mapping of Pt@U6N.....                                                                                                              | S8  |
| 16. Figure S13. XPS spectrum of Pt@U6N.....                                                                                                                            | S8  |
| 17. Figure S14. XPS spectrum of Pt/U6N.....                                                                                                                            | S9  |
| 18. Figure S15. The band gap of U6N, Pt/U6N, Pt@U6N and PCs@U6N.....                                                                                                   | S9  |
| 19. Figure S16. The repetitive UV-vis diffuse reflectance spectra and the comparison of UV-vis diffuse reflectance spectra of PCs@U6N, PCs-U6N, Pt-U6N and CPU6N. .... | S10 |
| 20. Figure S17. Photocurrent response and nyquist plots of electrochemical impedance spectroscopy (EIS) for PCs@U6N, Pt@U6N, Pt/U6N and U6N. ....                      | S10 |
| 21. Figure S18. The photocatalytic hydrogen-production rates (a) of PCs-U6N, Pt-U6N and CPU6N; the performance comparison (b) of PCs-U6N, Pt-U6N and CPU6N. ....       | S11 |
| 22. Figure S19. PXRD patterns of PCs@U6N before and after HER reaction.....                                                                                            | S11 |
| 23. Figure S20. TEM images of PCs@U6N after HER reaction.....                                                                                                          | S12 |
| 24. Figure S21. Photocatalytic hydrogen-production rates with Er B and Eo Y.....                                                                                       | S12 |
| 25. Figure S22. Photocatalytic hydrogen-production rates with TEOA and TEA.....                                                                                        | S13 |
| 26. Figure S23. Comparison of photocatalytic hydrogen-production rates.....                                                                                            | S13 |
| 27. Figure S24. Photocatalytic hydrogen-production of PCs@U6N with various amounts of Er B.....                                                                        | S14 |
| 28. Figure S25. XPS spectrum of PCs@U6N after HER with photosensitizer.....                                                                                            | S14 |
| 29. Figure S26. High-resolution XPS spectrum of PCs@U6N after recycle with Er B.....                                                                                   | S15 |
| 30. Figure S27. The Pt L <sub>3</sub> -edge EXAFS of Pt foil, Pt@U6N and PCs@U6N in k spaces.....                                                                      | S16 |
| 32. References.....                                                                                                                                                    | S17 |

**Table S1.** ICP-MS analysis of catalysts

| Sample  | Pt wt% | H <sub>2</sub> evolution rate ( $\mu\text{mol g}^{-1} \text{h}^{-1}$ ) |
|---------|--------|------------------------------------------------------------------------|
| U6N     | 0      | 1.03                                                                   |
| Pt/U6N  | 1.73   | 24.34                                                                  |
| Pt@U6N  | 1.81   | 87.24                                                                  |
| PCs@U6N | 1.20   | 151.48                                                                 |
| Pt-U6N  | 1.38   | 8.81                                                                   |
| PCs-U6N | 0.63   | 16.17                                                                  |
| CPU6N   | 0.48   | 6.66                                                                   |

**Table S2.** Summary of some MOF-based photocatalysts

| Sample  | Co-catalyst | Light source | Sacrificial reagent | Photosensitizer                | H <sub>2</sub> evolution rate ( $\mu\text{mol g}^{-1} \text{h}^{-1}$ ) | TON    | Reference  |
|---------|-------------|--------------|---------------------|--------------------------------|------------------------------------------------------------------------|--------|------------|
| PCs@U6N | Pt          | Visible      | TEOA                | Er B                           | 36830.0                                                                | 598.67 | This paper |
| Zr-MOF  | Pt          | Visible      | TEOA                | Er B                           | 41396.4                                                                | 161.7  | 1          |
| Zr-MOF  | Pt          | Visible      | Methanol            | Er B                           | 460                                                                    | 17.4   | 2          |
| Zr-MOF  | Pt          | Visible      | TEOA                | Rh B                           | 116.1                                                                  | 2.3    | 3          |
| Zr-MOF  | Pt          | Visible      |                     | [Ir(ppy) <sub>2</sub> (bpy)]Cl |                                                                        | 90.9   | 4          |
| Cr-MOF  | Pt          | Visible      | TEOA                | Rh B                           | 580                                                                    | 7.5    | 5          |
| Zr-MOF  | Pt          | Visible      | Methanol            | Arene dye                      | 1528                                                                   | 400    | 6          |
| Hf-MOF  | Pd          | Visible      | TEOA                | None                           | 7550                                                                   | 482.5  | 7          |
| Ti-MOF  | Pt/Au       | UV-Vis       | TEOA                | None                           | 1743                                                                   | 69.38  | 8          |
| In-MOF  | Pt          | UV-Vis       | TEOA                | None                           | 341                                                                    | 4.5    | 9          |

The turnover number of per hour was calculated by the equation of  $\text{TON} = n(\text{H}_2)/n(\text{Pt})$  based on the content of Pt.

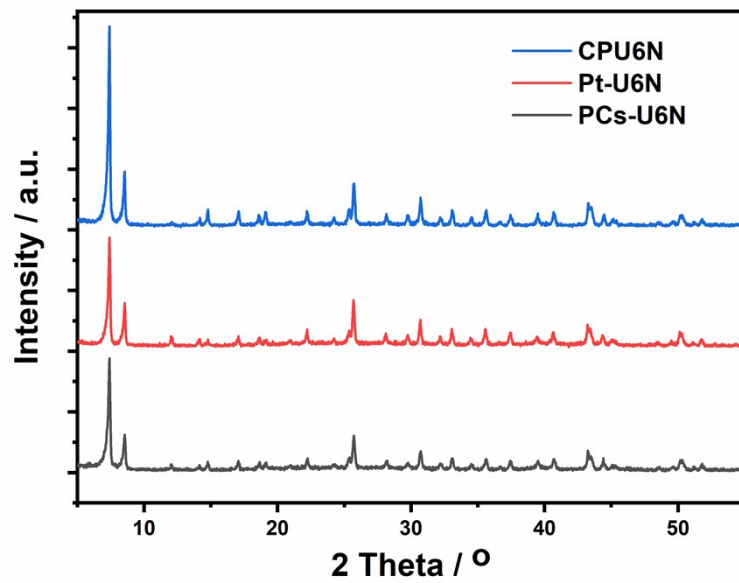

**Figure S1.** The PXRD patterns of PCs-U6N, Pt-U6N and CPU6N.

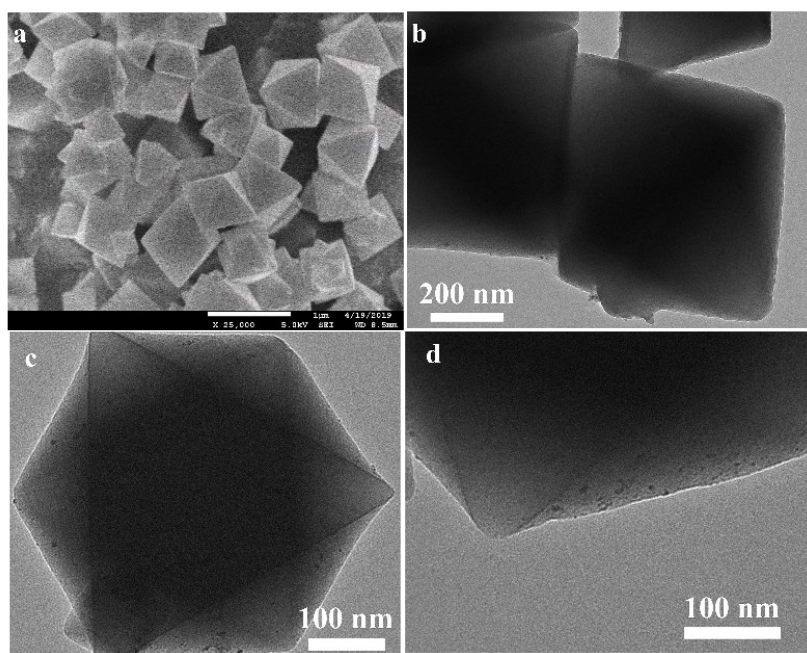

**Figure S2.** SEM image (a) and TEM images of PCs@U6N (b) and CPU6N (c and d).

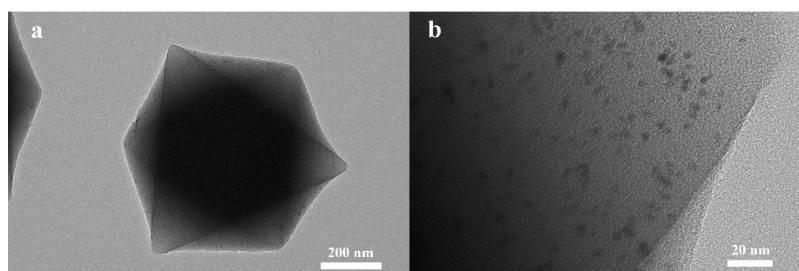

**Figure S3.** TEM images of PCs-U6N.

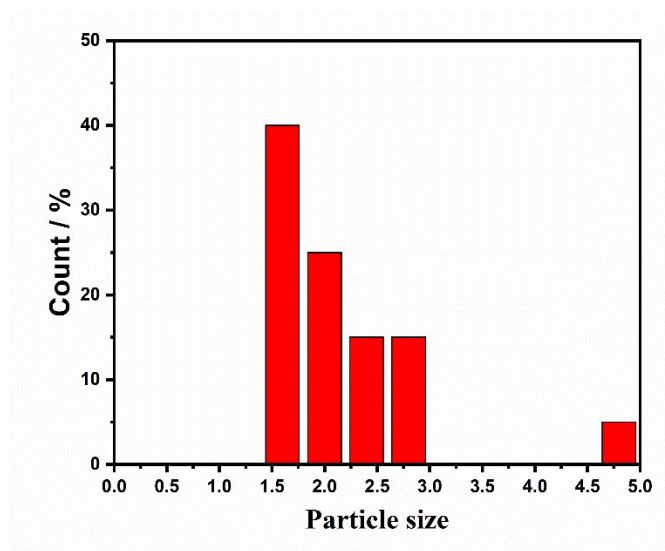

**Figure S4.** Pt nanoparticle size distribution in PCs-U6N.

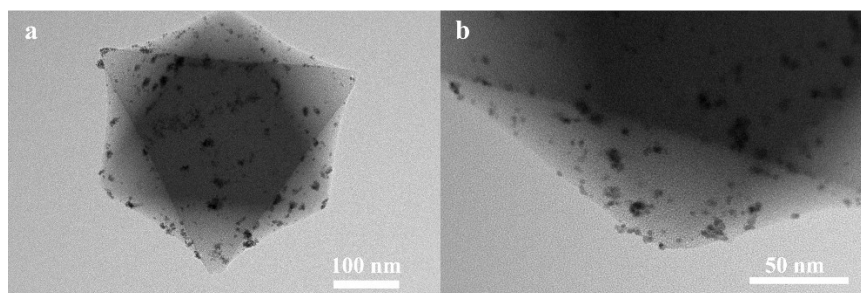

**Figure S5.** TEM images of Pt-U6N.

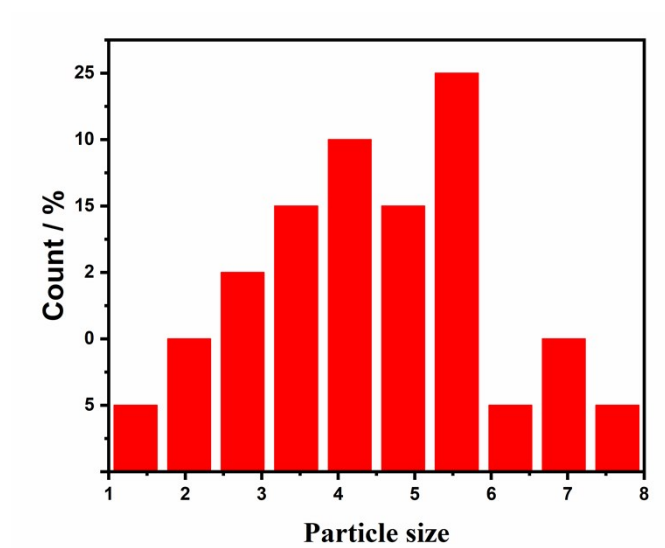

**Figure S6.** Pt nanoparticle size distribution in Pt-U6N.

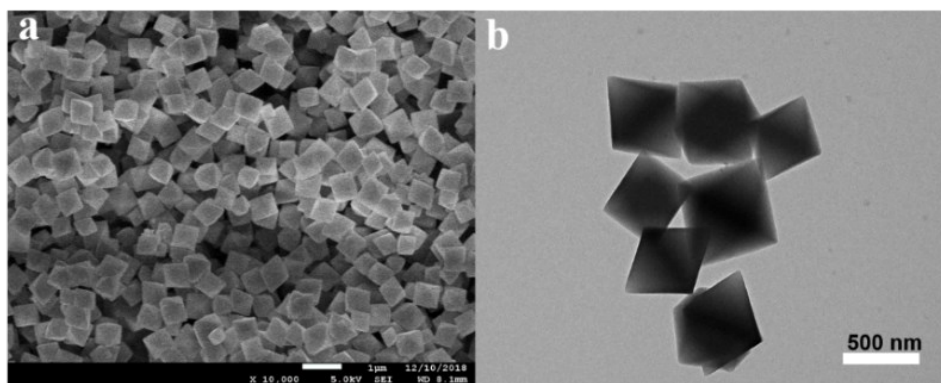

**Figure S7.** SEM image (a) and TEM image (b) of U6N.

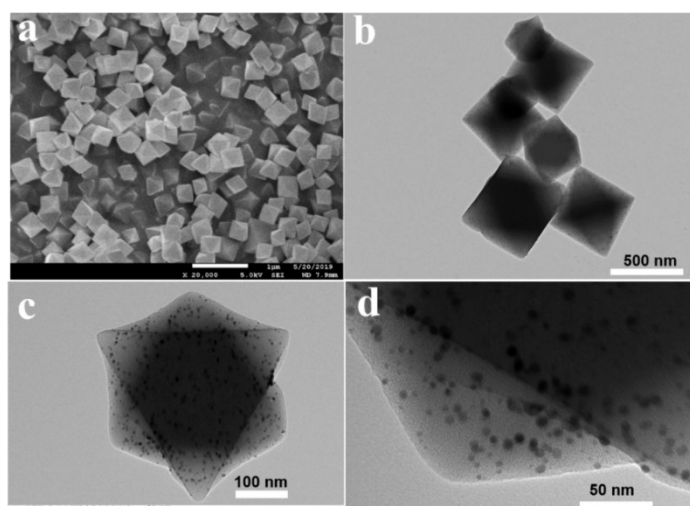

**Figure S8.** SEM image (a) and TEM images (b-d) of Pt@U6N.

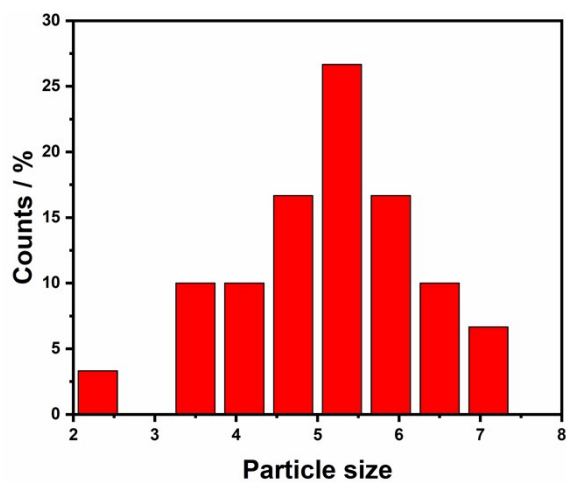

**Figure S9.** Pt nanoparticle size distribution in Pt@U6N.

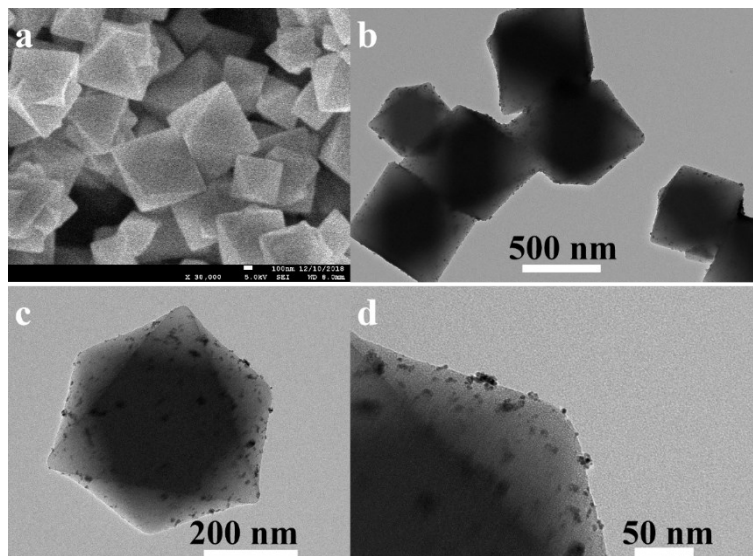

**Figure S10.** SEM image (a) and TEM images (b-d) of Pt/U6N.

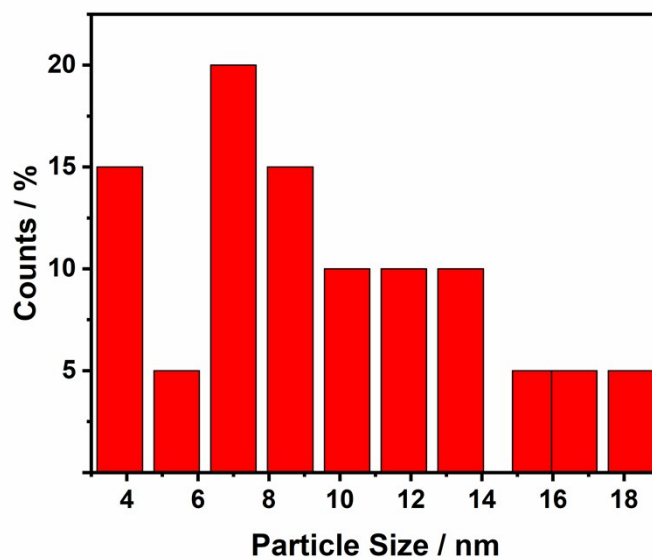

**Figure S11.** Pt nanoparticle size distribution in Pt/U6N.

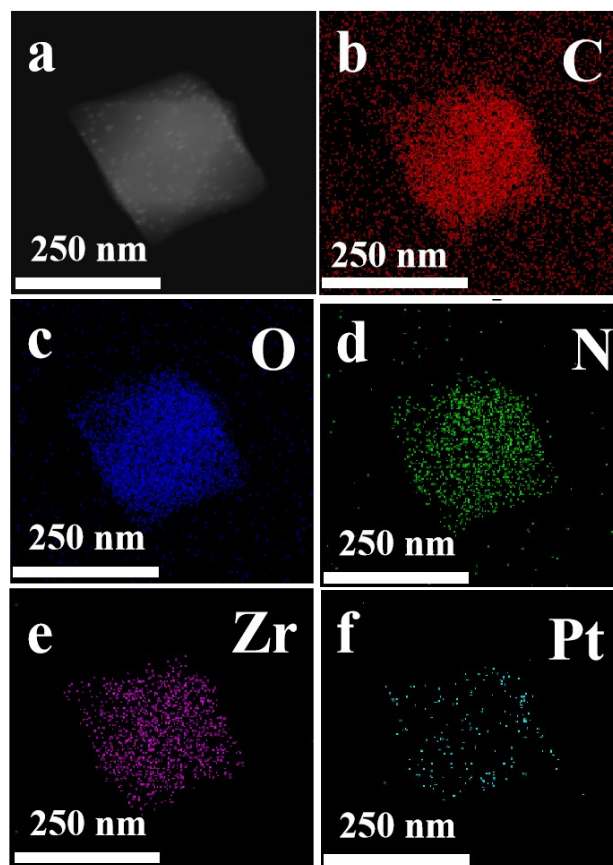

**Figure S12.** HAADF-STEM image (a) and element mapping images (b-f) of Pt@U6N.

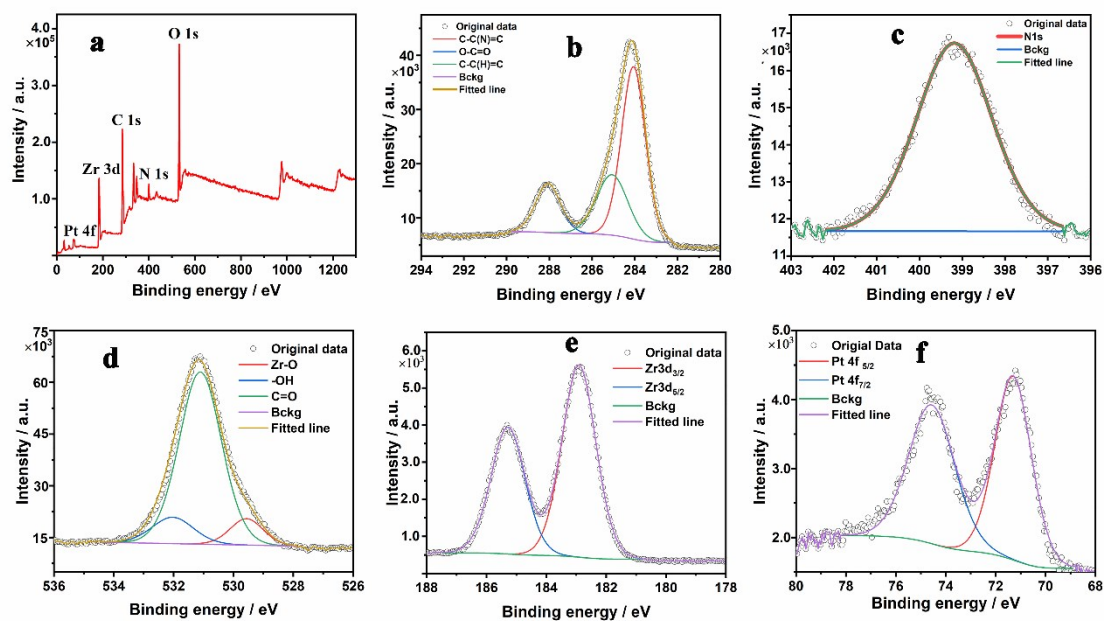

**Figure S13.** XPS survey spectrum (a) and high resolution XPS spectra of (b) C 1s, (c) N 1s, (d) O 1 s, (e) Zr 3d and (f) Pt 4f for Pt@U6N.



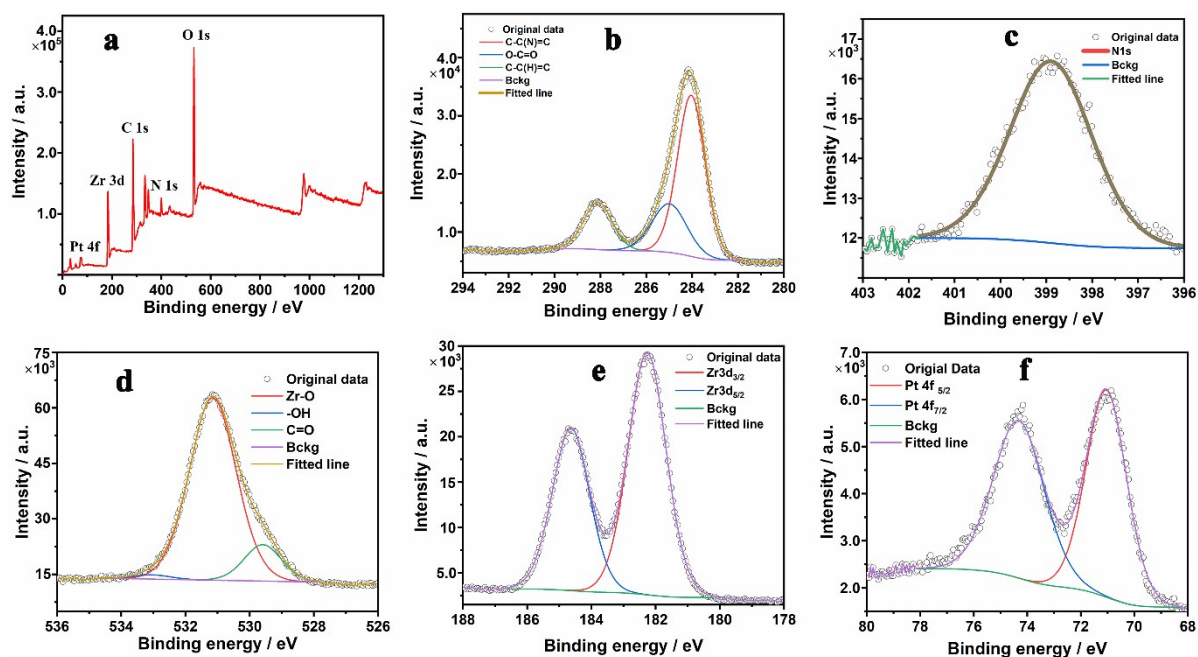

**Figure S14.** XPS survey spectrum (a) and high resolution XPS spectra of (b) C 1s, (c) N 1s, (d) O 1s, (e) Zr 3d and (f) Pt 4f for Pt/U6N.

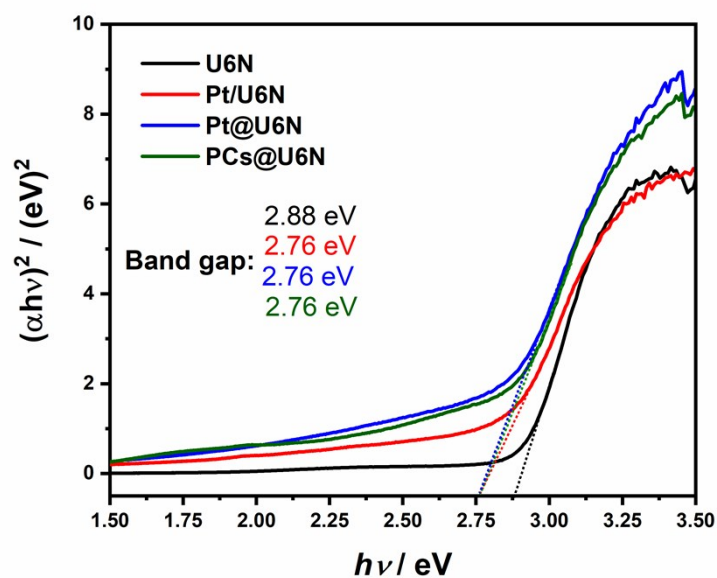

**Figure S15.** The band gap of U6N, Pt/U6N, Pt@U6N and PCs@U6N obtained through the Tauc plot method.

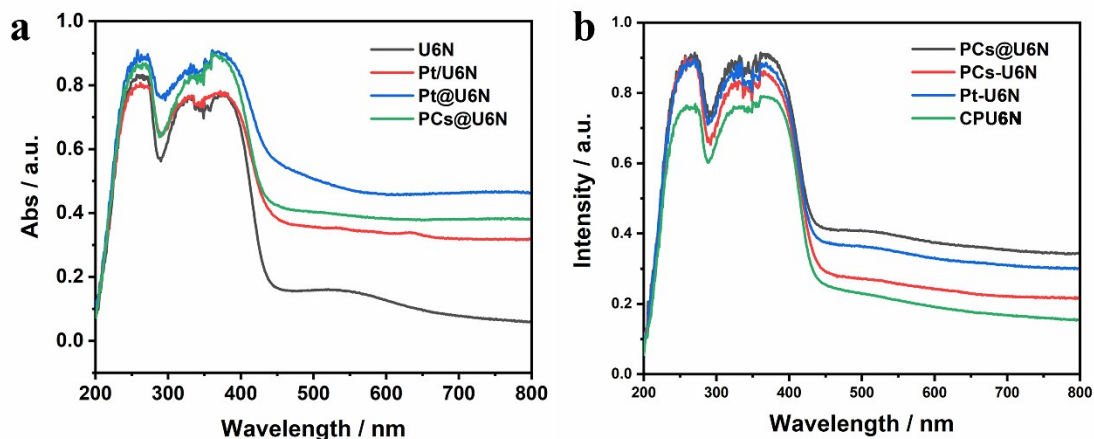

**Figure S16.** The repetitive UV-vis diffuse reflectance spectra of U6N, Pt/U6N, Pt@U6N and PCs@U6N after one month of the first test; the comparison of UV-vis diffuse reflectance spectra of PCs@U6N, PCs-U6N, Pt-U6N and CPU6N.

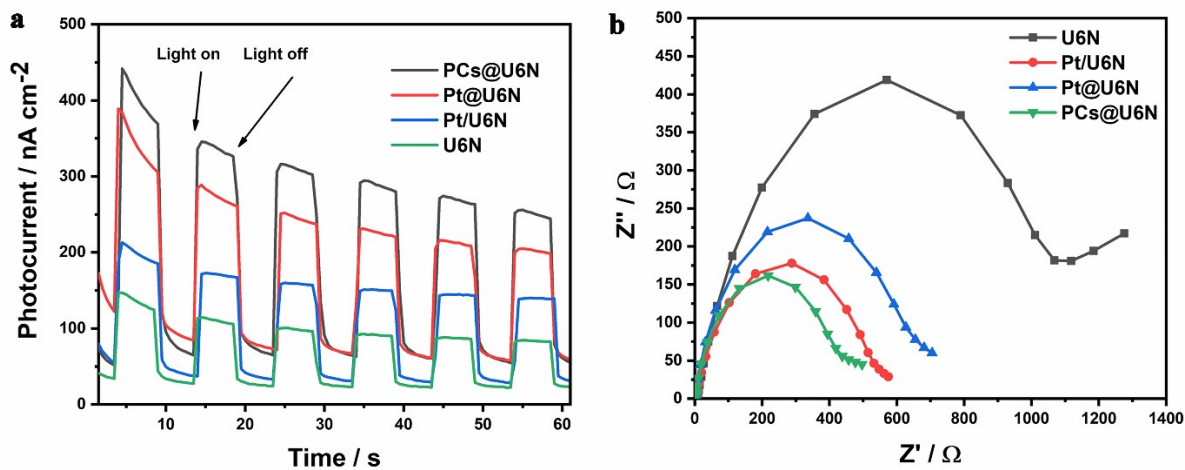

**Figure S17.** Photocurrent response and nyquist plots of electrochemical impedance spectroscopy (EIS) for PCs@U6N, Pt@U6N, Pt/U6N and U6N.

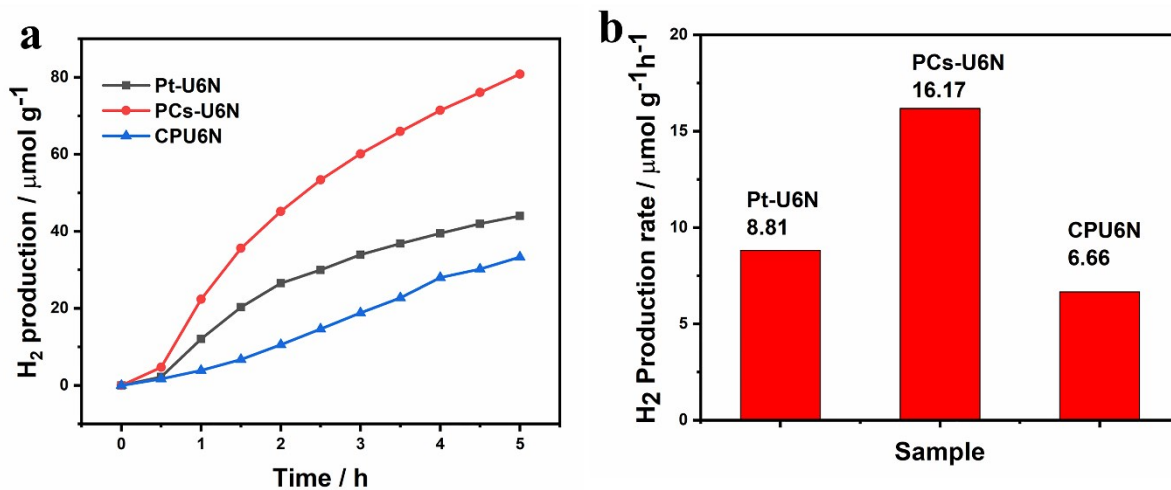

**Figure S18.** The photocatalytic hydrogen-production rates (a) of PCs-U6N, Pt-U6N and CPU6N; the performance comparison (b) of PCs-U6N, Pt-U6N and CPU6N.

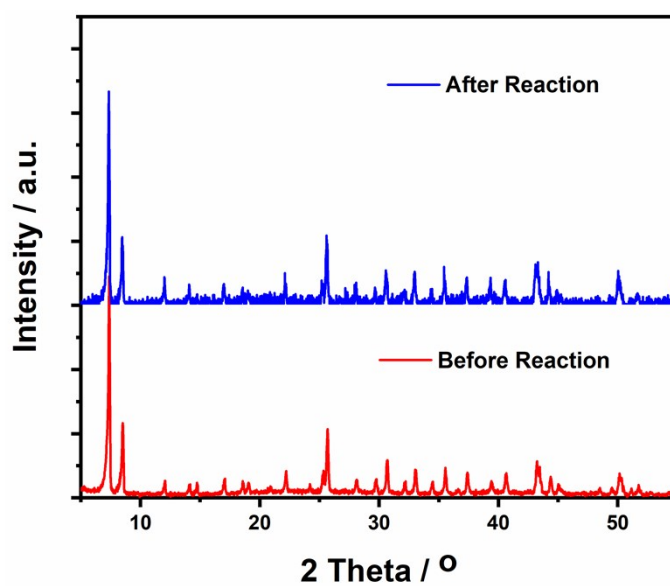

**Figure 19.** The PXRD patterns of PCs@U6N before and after HER reaction without Er B.

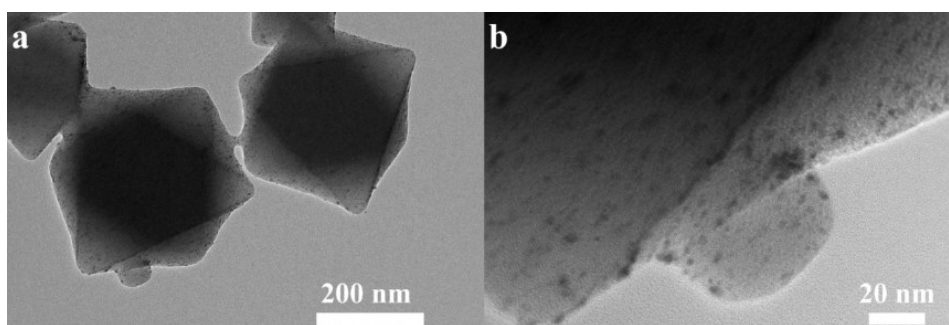

**Figure 20.** (a) The TEM image (a) and HRTEM image (b) of PCs@U6N after HER reaction without photosensitizer.

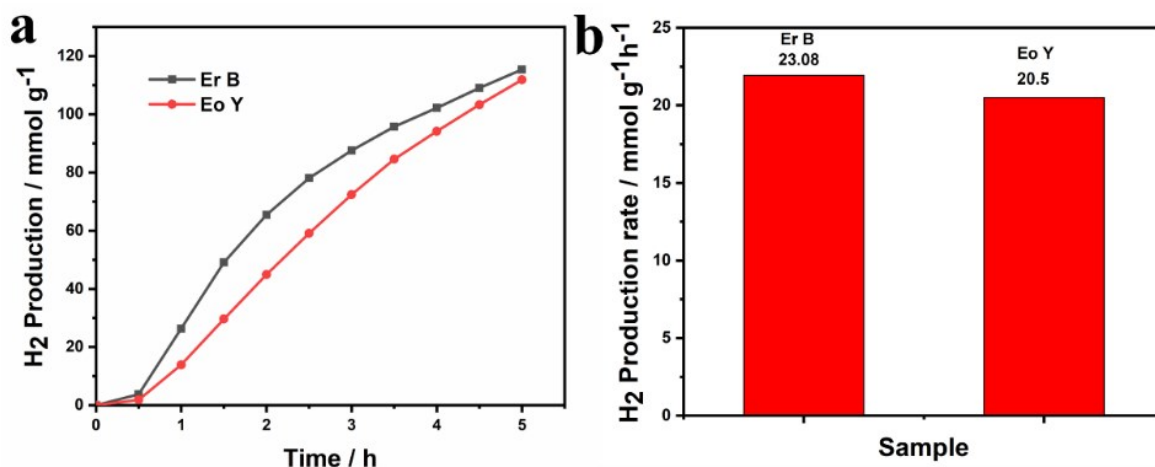

**Figure S21.** The photocatalytic hydrogen-production rates (a) of PCs@U6N with different molecular photosensitizer and performance comparison (b).

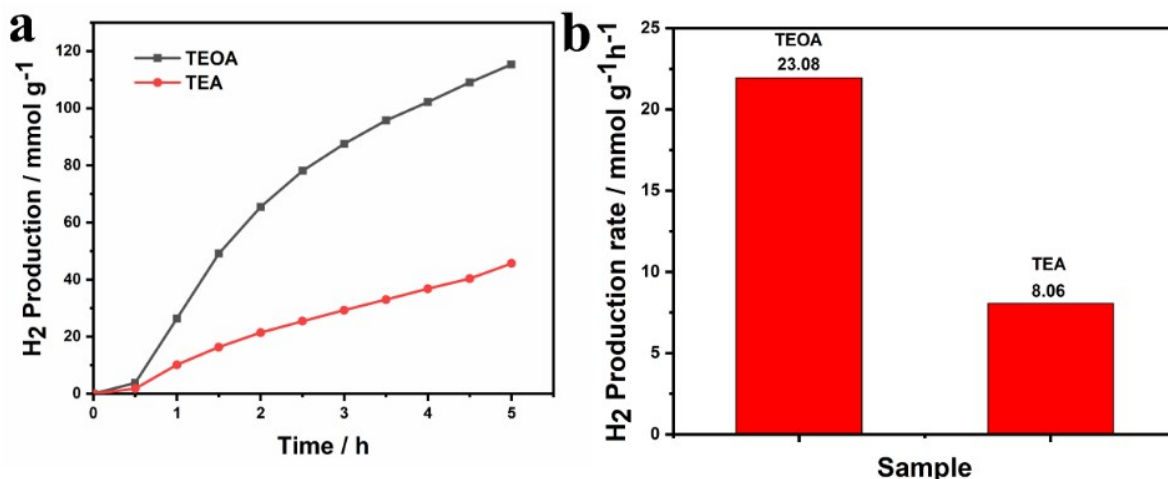

**Figure S22.** The photocatalytic hydrogen-production rates (a) of PCs@U6N with different sacrificial agent and (b) performance comparison.

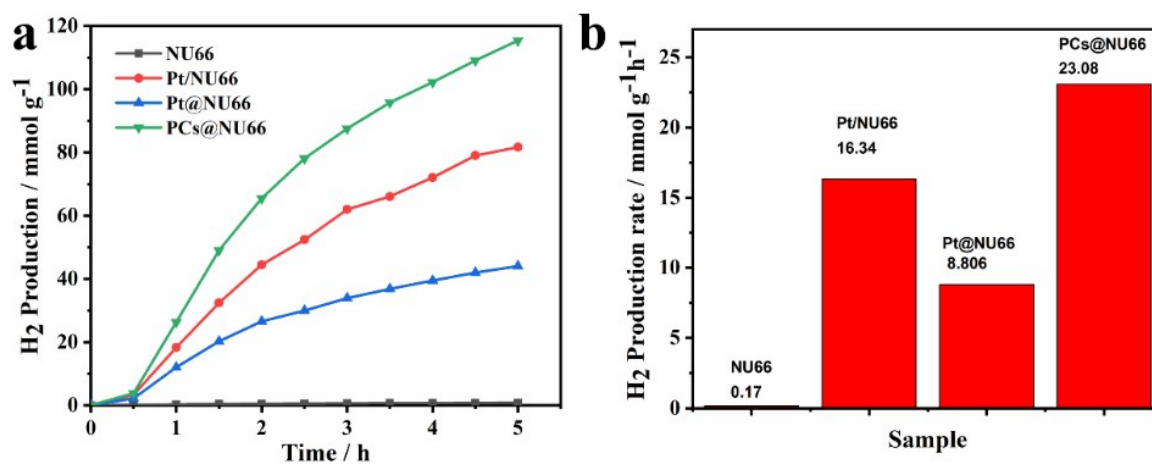

**Figure S23.** The photocatalytic hydrogen-production rates of PCs@U6N, Pt@U6N, Pt/U6N and U6N (a) and performance comparison (b) with a mass ratio (5:1) of catalyst to photosensitizer under visible light.

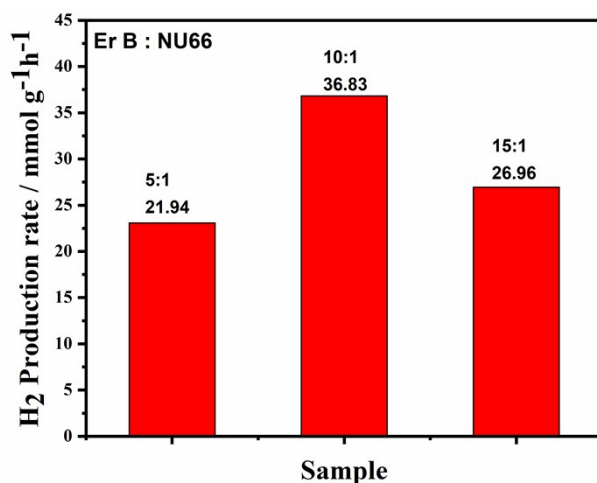

**Figure S24.** The photocatalytic hydrogen-production performance comparison of PCs@U6N with various amounts of Er B.

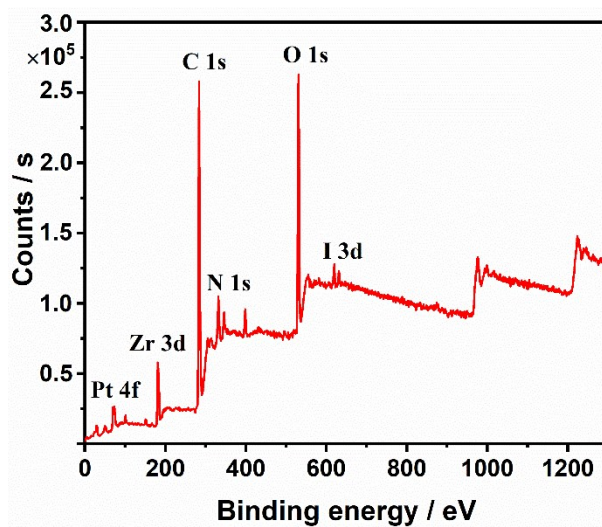

**Figure S25.** XPS spectrum of PCs@U6N after recycle used with photosensitizer.

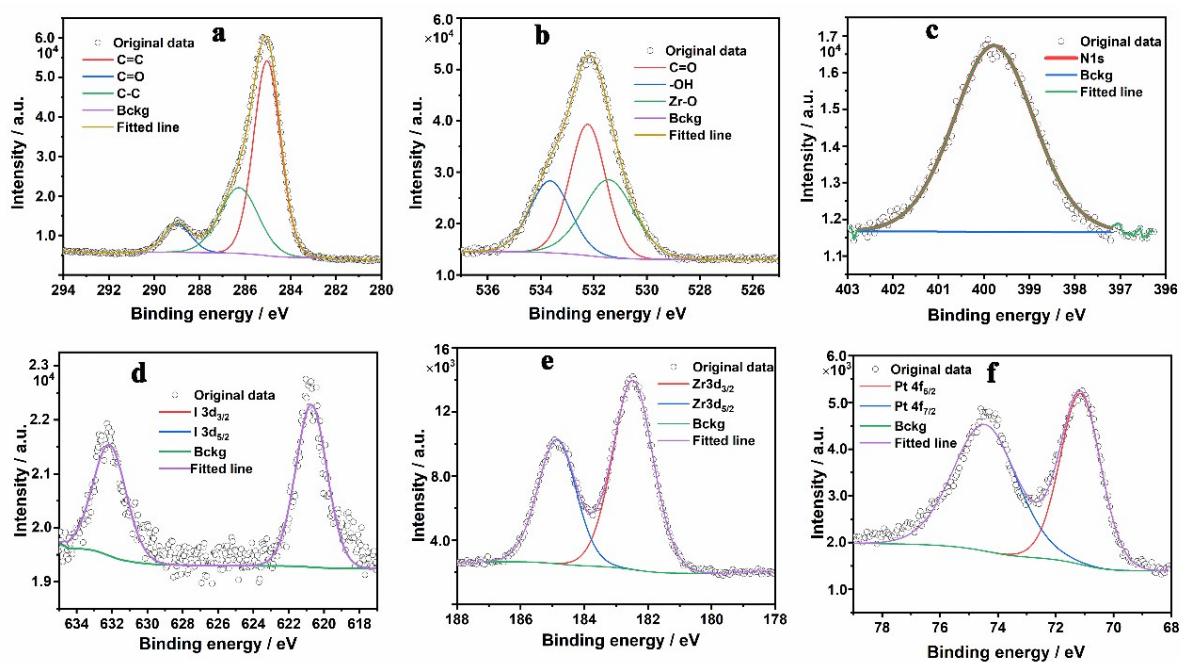

**Figure S26.** High-resolution C 1s (a), O 1s (b), N 1s (c), I 3d (d), Zr 3d (e) and Pt 4f (f) XPS spectrum of PCs@U6N after recycle used with molecular photosensitizer Er B.

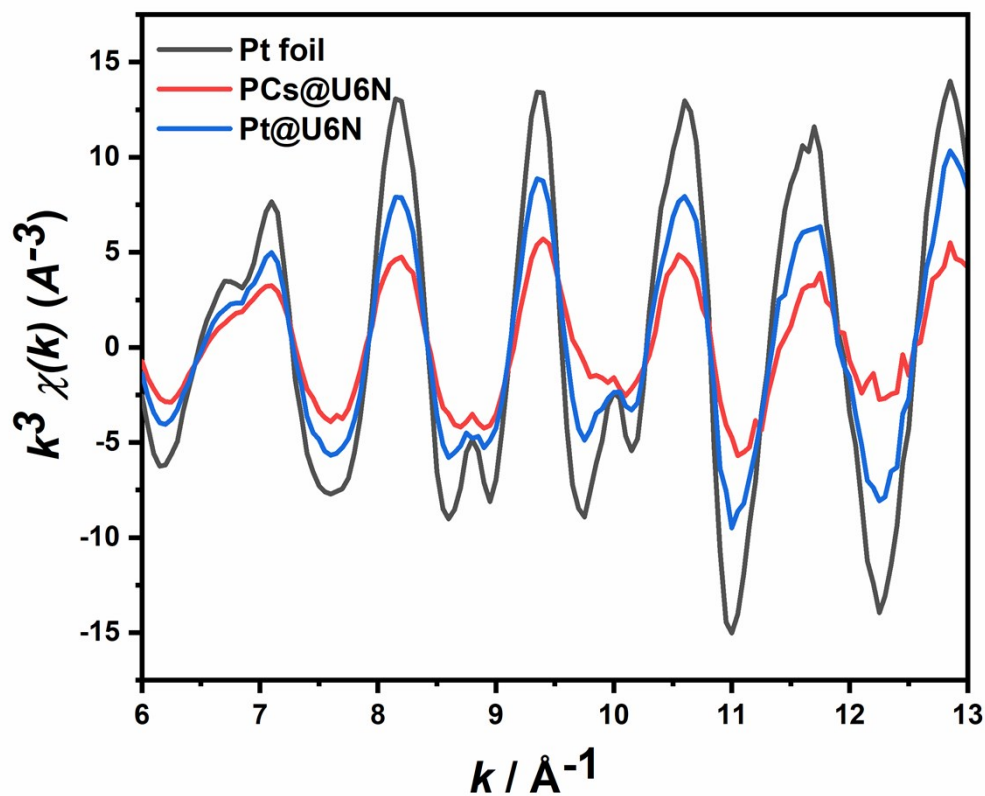

**Figure S27.** The Pt L<sub>3</sub>-edge EXAFS of Pt foil, Pt@U6N and PCs@U6N in k spaces.

## References

- 1 Y. Wang, Y. Yu, R. Li, H. Liu, W. Zhang, L. Ling, W. Duan, B. Liu, *J. Mater. Chem. A*. 2017, **5**, 20136.
- 2 Y.-P. Yuan, L.-S. Yin, S.-W. Cao, G.-S. Xu, C.-H. Li, C. Xue, *Appl. Catal. B* 2015, **572**, 168.
- 3 J. He, J.-Q. Wang; Y.-J. Chen, J.-P. Zhang D.-L. Duan, Y. Wang, Z. Yan, *Chem. Commun.* 2014, **50**, 7063.
- 4 C. Wang, K. E. deKrafft, W. Lin, *J. Am. Chem. Soc.* 2012, **134**, 7211.
- 5 M. Wen, K. Mori, T. Kamegawa, H. Yamashita, *Chem. Commun.* 2014, **50**, 11645.
- 6 Y.-F. Chen, L.-L. Tan, J.-M. Liu, S. Qin, Z.-Q. Xie, J.-F. Huang, Y.-W. Xu, L.-M. Xiao, C.-Y. Su, *Appl. Catal. B* 2017, **206**, 426.
- 7 S. Li, H.-M. Mei, S.-L. Yao, Z.-Y. Chen, Y.-L. Lu, L. Zhang, C.-Y. Su, *Chem. Sci.* 2019, **10**, 10577.
- 8 J. D. Xiao, L. Han, J. Luo, S. H. Yu, H. L. Jiang, *Angew. Chem. Int. Ed.* 2018, **57**, 1103.
- 9 F. Leng, H. Liu, M. Ding, Q.-P. Lin, H.-L. Jiang, *ACS Catal.* 2018, **8**, 4583-4590.
